# Supplementary material for: The electronic structure of nitrilimines revisitedElectronic supplementary information (ESI) available: Optimized structures and absolute energies of all stationary points. See http://www.rsc.org/suppdata/cc/b4/b407302a/
Source: Royal Society of Chemistry journal article supplement (doi:10.1039/b407302a), 2004-01-01
Supplement: b407302a.doc [file b407302a.doc]

**H-CNN-BH2**

-174.0162987 hartree

N -0.4966253784,0.,0.3156088992

N 0.7500812005,0.,0.2833677692

C -1.6421462102,0.,0.4538136971

B 1.4528087371,0.,-0.9382260219

H -2.689225143,0.,0.6400043814

H 0.8593701325,0.,-1.9827655495

H 2.6444978311,0.,-0.8818275839

**H-CNN-H**

-148.5789555 hartree

N -0.0546328415,0.0008092211,-0.0163710296

N 1.1743645147,0.0433909279,0.0420123362

C -1.2288249922,-0.0315526147,0.1300566239

H 1.5722308472,-0.6231966397,-0.6221220776

H -2.0374026066,0.5031112844,-0.3377068122

**F-CNN-H**

-247.7362544 hartree

N 0.533879849,-0.134857754,0.0576971078

N 1.7536307318,-0.1276928968,0.1744800203

C -0.6581039604,-0.2466667157,0.2933480042

H 2.1584229757,-0.7971811378,-0.4914236612

F -1.5802636977,0.4572262208,-0.3215449178

**F-CNN-F**

-346.8636848 hartree

N 0.0538803763,0.1230899742,0.197376162

N 1.2485202006,0.1075370412,0.330998472

C -1.1610194401,-0.0524852004,0.48303285

F 1.7888532015,-0.8248233162,-0.5722434131

F -2.0278184679,0.6804368823,-0.1607365356

**H2N-CNN-NH2**

-259.1939319 hartree

N -0.0488688108,-0.2920420506,0.0652067025

N 1.1019706354,0.1427805402,0.1840123668

C -1.1744234655,0.0376695958,0.6488135166

N 2.0467426282,-0.6603781228,-0.3822623241

N -2.0541135519,0.7006052164,-0.0729344649

H -1.8712483148,1.0540469226,-1.0080101935

H -2.9678513399,0.8731029268,0.3079059786

H 1.7039390155,-1.2685092757,-1.1200199304

H 2.8615851261,-0.1214172312,-0.6309129164
